# Supplementary material for: Cytogenetic and molecular genotyping in the allotetraploid Festuca pratensis × Lolium perenne hybrids
Source: BMC Genomics. 2019 May 14;20:367. doi: 10.1186/s12864-019-5766-2 (PMC6518686; doi:10.1186/s12864-019-5766-2)
Supplement: Supplementary file 3 — Table S2. The Polymorphism Information Content (PIC) calculated for individual ISSR primer and the PIC mean value. PIC values are provided for individuals that were used as parents for each of the cross combinations, as well as for the F2 and F3 populations. (XLSX 11 kb) [file 12864_2019_5766_MOESM3_ESM.xlsx]

## Sheet: Table S2
Table S2. The Polymorphism Information Content (PIC) calculated for individual ISSR primer and the PIC mean value. PIC values are provided for individuals that were used as parents for each of the cross combinations, as well as for the F2 and F3 populations.
Sample/Population	Polymorphism Information Content (PIC)									Mean PIC
	Primer L1	Primer L2	Primer L3	Primer L4	Primer L5	Primer L6	Primer L7	Primer L8	Primer L9
Fp 11/59	0.352173	0.334326	0.341059	0.357493	0.331259	0.385946	0.385946	0.436749	0.346395	0.363483
Lp 08/33	0.356456	0.365428	0.412994	0.404447	0.375994	0.35433	0.339194	0.404447	0.35433	0.37418
F1 6-2A	0.266485	0.194671	0.228404	0.256857	0.265404	0.316604	0.316604	0.297095	0.246291	0.265379
F1 6-7A	0.227569	0.202106	0.173653	0.242344	0.245653	0.237927	0.237927	0.242344	0.237927	0.227494
F1 6-3B	0.352173	0.357493	0.405059	0.436749	0.341059	0.346395	0.346395	0.396512	0.385946	0.374198
F2 2A-15	0.254403	0.200382	0.183947	0.2394	0.282947	0.275221	0.299147	0.279638	0.275221	0.254478
F2 2A-5	0.266485	0.217838	0.201404	0.256857	0.300404	0.292678	0.292678	0.297095	0.292678	0.26868
F2 2A-27	0.297888	0.265448	0.239213	0.304466	0.313013	0.293901	0.364213	0.344704	0.293901	0.301861
F2 2A-12	0.277734	0.234502	0.245067	0.27352	0.317067	0.262955	0.309341	0.313758	0.262955	0.277433
F2 combination no. 1	0.291399	0.235743	0.233449	0.304442	0.301344	0.306239	0.315907	0.337142	0.285276	0.290105
F2 combination no. 2	0.510156	0.480623	0.471891	0.511879	0.554774	0.553915	0.566359	0.510128	0.527299	0.52078
F3 combination no. 3	0.141107	0.150322	0.11279	0.134799	0.149771	0.130694	0.152695	0.151051	0.121074	0.138256
F3 combination no. 4	0.201726	0.208743	0.218276	0.16595	0.222129	0.176871	0.173439	0.223036	0.185825	0.197333
